# Supplementary material for: Gibberellin Promotes Shoot Branching in the Perennial Woody Plant Jatropha curcas
Source: PubMed Central journal article supplement (PMC4523387; doi:10.1093/pcp/pcv089), 2015-06-15
Supplement: supp_pcv089_pcp-2015-e-00126-File012.pdf [file supp_pcv089_pcp-2015-e-00126-File012.pdf]

## Supplementary data

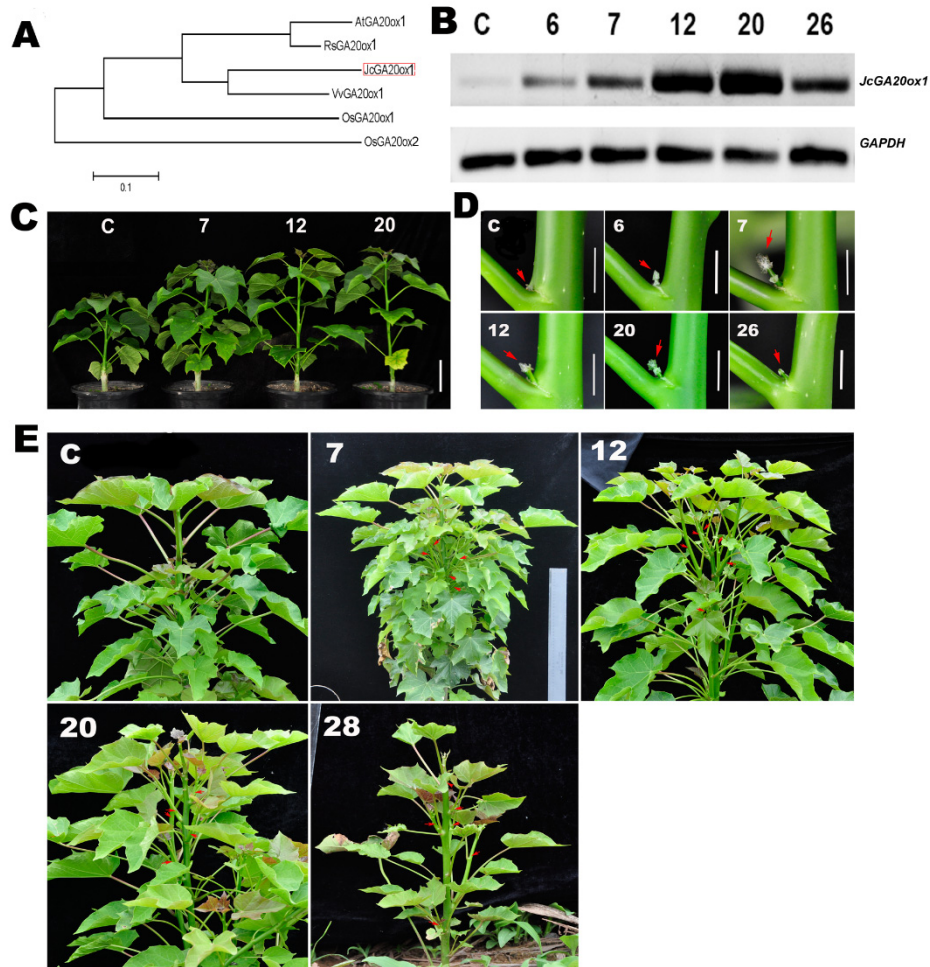

**Supplementary Figure S1.** Overexpression of *JcGA20ox1* in *J. curcas* promotes lateral bud outgrowth. (A) Phylogenetic analysis of *JcGA20ox1* and its homologues from *Arabidopsis thaliana* (*AtGA20ox1*), *Ricinus communis* (*RsGA20ox1*), *Vitis vinifera* (*VvGA20ox1*), and *Oryza sativa* (*OsGA20ox1* and *OsGA20ox2*). The scale represents 0.1 amino acid substitutions per site. (B) RT-PCR test for identification of positive transgenic lines. *JcGAPDH* is shown as control. (C) Control and transgenic plants overexpressing *JcGA20ox1* three months after grafting. Bars = 5 cm. (D) Overexpression of *JcGA20ox1* led to lateral bud outgrowth. Bars = 1 cm. (E) Transgenic plants in the field exhibited enhanced branching. (B) to (E): C indicates control plants, and the numbers indicate transgenic lines 6, 7, 12, 20, 26, and 28, respectively. The red arrows indicate the stimulated axillary buds.

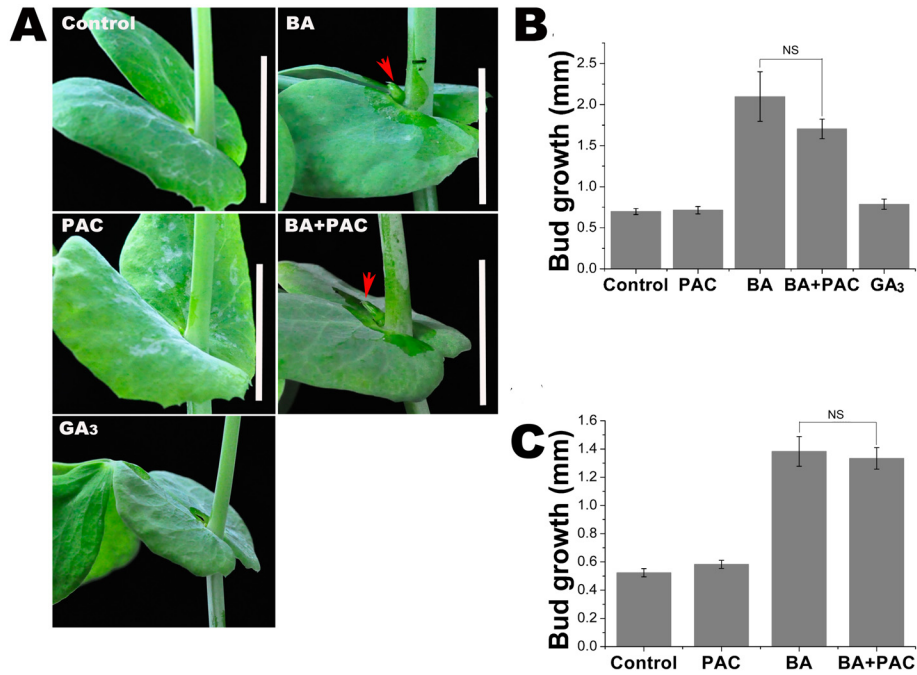

**Supplementary Figure S2.** Bud outgrowth in pea is significantly promoted by BA not GA treatment. (A and B) Outgrowth of lateral buds at node 3 was significantly affected by treatment with BA (100  $\mu$ M), but not GA<sub>3</sub> (100  $\mu$ M) or its biosynthesis inhibitor PAC (100  $\mu$ M). Photos and data were taken at 5 days after treatment. (C) The BA-mediated increase in outgrowth of lateral buds at node 2 is not affected by co-application of PAC. Data were taken at 4 days after treatment. Two-week-old pea seedlings were used for all treatment in (A-C). In (B) and (C), values are means  $\pm$  SE (n = 15). Student's *t*-test was used to determine significant differences between the indicated groups. NS indicates no significant difference.

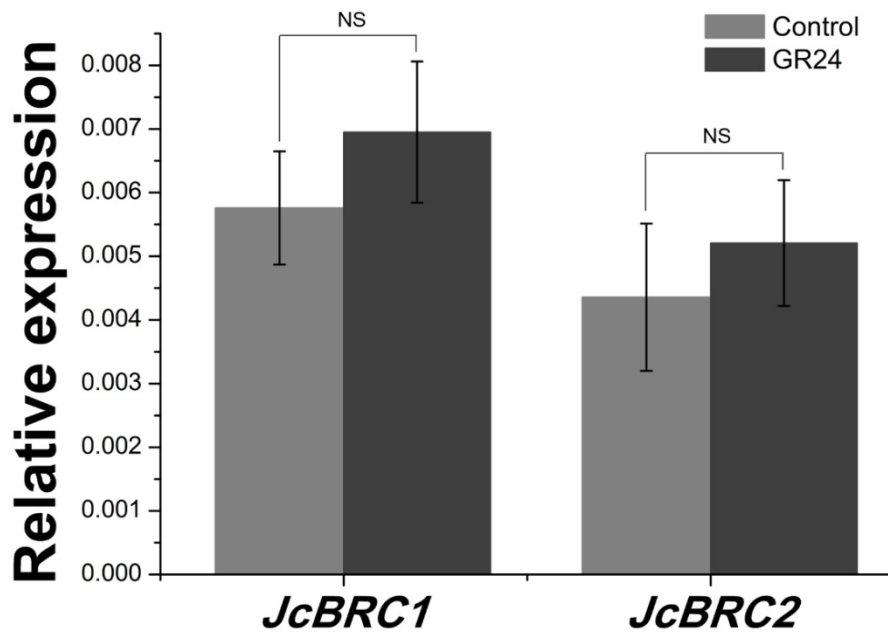

**Supplementary Figure S3.** Expression of *JcBRC1* and *JcBRC2* was not significantly affected by a 12-h GR24 (50  $\mu$ M) treatment at node 1 of three-week-old *J. curcas* seedlings. *JcGAPDH* was used as the internal reference. Values are means  $\pm$  SE (n = 3). Student's *t*-test (p value < 0.05) was used to determine significant differences between the treated and control groups. NS indicates no significant difference.

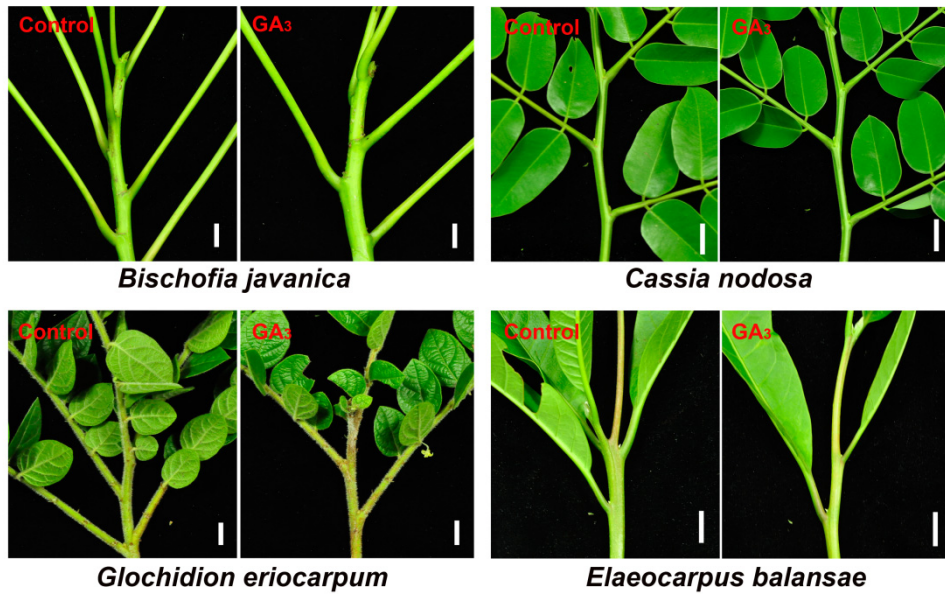

**Supplementary Figure S4.** GA<sub>3</sub> treatment did not promote the lateral bud outgrowth in *Bischofia javanica*, *Cassia nodosa*, *Glochidion eriocarpum* and *Elaeocarpus balansae*. Photos were taken one week after treatment. Bars = 1 cm.

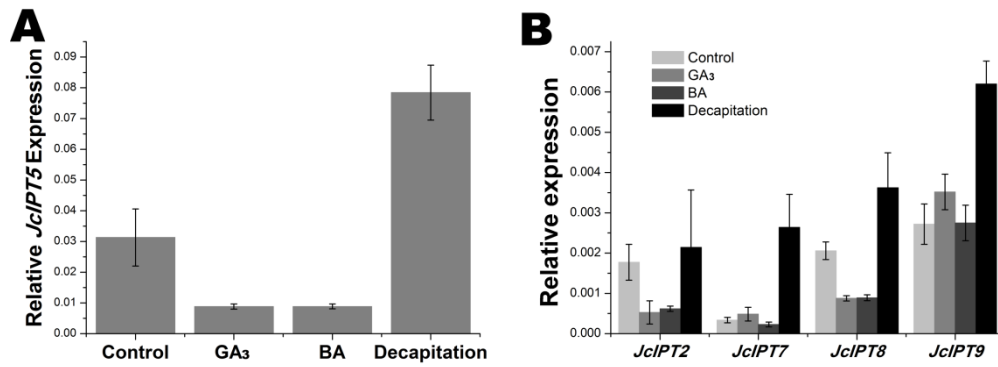

**Supplementary Figure S5.** Effects of GA<sub>3</sub>, BA and decapitation on the expression of *JcIPTs* at node 1. The expression of *J. curcas* homologues of *Arabidopsis IPT5* (A), *IPT2*, *IPT7*, *IPT8*, and *IPT9* (B) was analyzed six hours after GA<sub>3</sub> (500 μM), BA (500 μM) or decapitation treatment. Values are means ± SE (n = 3). *JcGAPDH* was used as the internal reference.

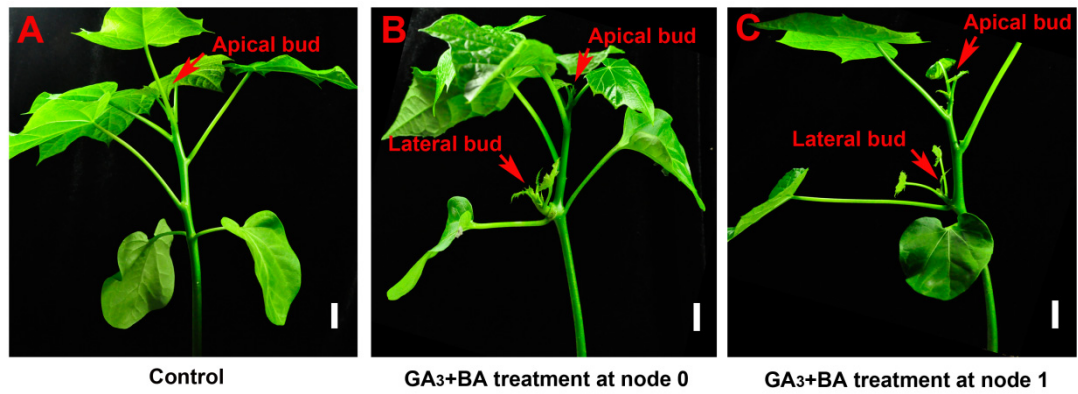

**Supplementary Figure S6.** Outgrowth of lateral buds inhibited the growth of apical buds. The outgrowth of lateral buds at node 0 (B) and node 1 (C) of three-week-old *J. curcas* seedlings was promoted by co-application with GA<sub>3</sub> and BA (200  $\mu$ M each), which retarded the growth of apical buds. Photos were taken two weeks after treatment. Bars = 1 cm.

**Supplementary Table S1. List of primers used in this study**

| <b>Primer name</b> | <b>Primer sequence</b>                 | <b>Gene</b>       | <b>Experiment</b>    |
|--------------------|----------------------------------------|-------------------|----------------------|
| XK918              | 5' GGAGAGAGCCAAGGAGAAAGAGA 3'          | <i>JcBRC1</i>     | qPCR                 |
| XK919              | 5' GTAGCAGCAGTGTGATGGTTGT 3'           |                   |                      |
| XK958              | 5' GAATGAGATTATCGCTCCGAATTGCTA 3'      | <i>JcBRC2</i>     | qPCR                 |
| XK959              | 5' ACATTGCTTCACTCTTGAACACTATC 3'       |                   |                      |
| XA275              | 5' TGAACCCAAGCAAGTCCACCTCT 3'          | <i>JcCCD7</i>     | qPCR                 |
| XA276              | 5' GCAGCAGCCACATCTGTGAAGT 3'           |                   |                      |
| XA277              | 5' AAGTTGGAGGCAGCATTGGACC 3'           | <i>JcCCD8</i>     | qPCR                 |
| XA278              | 5' AAGAGGTTCAGAAGGCACAGCAC 3'          |                   |                      |
| XK471              | 5' CGGGATCCTTGATCTTCCTTACCTAATGAATC 3' | <i>JcGA20ox-1</i> | CDS<br>amplification |
| XK472              | 5' AACTGCAGGGTTAACAGTGACATTATTATTAC 3' |                   |                      |
| XA239              | 5' ACTTGGCGAACACTGTGGATATGC 3'         | <i>JcGA20ox-1</i> | qPCR                 |
| XA240              | 5' ATTGCTCATCACCTCACTGTACTCCT 3'       |                   |                      |
| XT960              | 5' TGAAGGACTGGAGAGGTGGAAGAGC 3'        | <i>JcGAPDH</i>    | qPCR                 |
| XT961              | 5' ATCAACAGTTGGAACACGGAAAGCC 3'        |                   |                      |
| XA279              | 5' AGTGGTCGGTTAGATGAGATTGTAGC 3'       | <i>JcMAX1</i>     | qPCR                 |
| XA280              | 5' TGTGAACGCTGTTGTCGCTGAC 3'           |                   |                      |
| XA235              | 5' GAGACGAGACGCTGCTTGCTATTG 3'         | <i>JcMAX2</i>     | qPCR                 |
| XA236              | 5' CCTACAACACTGATCCGAGCATCCT 3'        |                   |                      |
| XT836              | 5' CCAATACCACCTCCTCgCCAC 3'            | <i>JcIPT2</i>     | qPCR                 |
| XT837              | 5' gACCCAACATCAAgACCACgg 3'            |                   |                      |
| XT834              | 5' ggCATCAAgCCTCggACTCTg 3'            | <i>JcIPT5</i>     | qPCR                 |
| XT835              | 5' AggCAATgACACATCCACCCA 3'            |                   |                      |
| XT846              | 5' TCAgTTCCACTCCCATTACATTT 3'          | <i>JcIPT7</i>     | qPCR                 |
| XT847              | 5' TgATTTACCACACCCAgTTgCTC 3'          |                   |                      |
| XT838              | 5' CAgAgTTCTTCAggAAgCAATACgC 3'        | <i>JcIPT8</i>     | qPCR                 |
| XT839              | 5' ggCTgTCAAActgTAAAgAAACCg 3'         |                   |                      |
| XT977              | 5' ATTCAggCTCTggTgAgTCCATTCC 3'        | <i>JcIPT9</i>     | qPCR                 |
| XT978              | 5' TTCCACCATACTCAggCgTCTCA 3'          |                   |                      |
